# Supplementary material for: Controlling the Antimicrobial Action of Surface Modified Magnesium Hydroxide Nanoparticles
Source: PubMed Central journal article supplement (PMC6631741; doi:10.3390/biomimetics4020041), 2019-06-25
Supplement: biomimetics-04-00041-s001.pdf [file biomimetics-04-00041-s001.pdf]

## Supporting Information

### Controlling the Antimicrobial Action of Surface Modified Magnesium Hydroxide Nanoparticles

Ahmed F. Halbus, Tommy S. Horozov, Vesselin N. Paunov

#### Contents

|                                                                                                                                                                                     |    |
|-------------------------------------------------------------------------------------------------------------------------------------------------------------------------------------|----|
| 1. A schematic of the synthesis method of Mg(OH) <sub>2</sub> NPs .....                                                                                                             | 2  |
| 2. The particles size and zeta potential of Mg(OH) <sub>2</sub> NPs .....                                                                                                           | 3  |
| 3. Preparation and Characterization of Mg(OH) <sub>2</sub> NPs.....                                                                                                                 | 4  |
| 4. Fourier Transform Infrared Spectroscopy (FTIR) of Mg(OH) <sub>2</sub> NPs.....                                                                                                   | 5  |
| 5. EDX diagram of <i>S. cerevisiae</i> cells with Mg(OH) <sub>2</sub> NPs.....                                                                                                      | 6  |
| 6. EDX chart of the <i>C. reinhardtii</i> with Mg(OH) <sub>2</sub> NPs .....                                                                                                        | 7  |
| 7. EDX chart of the <i>E. coli</i> with Mg(OH) <sub>2</sub> NPs.....                                                                                                                | 9  |
| 8. Schematic representation of the bacterial cell wall .....                                                                                                                        | 10 |
| 9. The antibacterial impact of MgCl <sub>2</sub> on <i>E. coli</i> .....                                                                                                            | 11 |
| 10. Comparison of the antimicrobial activity of uncoated and polyelectrolyte-coated Mg(OH) <sub>2</sub> NPs on <i>S.cerevisiae</i> , <i>C. reinhardtii</i> and <i>E. coli</i> ..... | 12 |
| 11. Colony forming units (CFUs) of the bare Mg(OH) <sub>2</sub> NPs and PAH-modified Mg(OH) <sub>2</sub> NPs against cells .....                                                    | 15 |
| 12. HEK 293 cell viability in the presence of bare Mg(OH) <sub>2</sub> NPs and PSS/PAH-coated Mg(OH) <sub>2</sub> NPs.....                                                          | 19 |
| 13. Antimicrobial assay of SiO <sub>2</sub> NPs on <i>E. coli</i> .....                                                                                                             | 20 |
| 14. Anti-yeast, anti-algal and antibacterial activity of free PAH in solution.....                                                                                                  | 21 |

1. A schematic of the synthesis method of  $\text{Mg}(\text{OH})_2\text{NPs}$

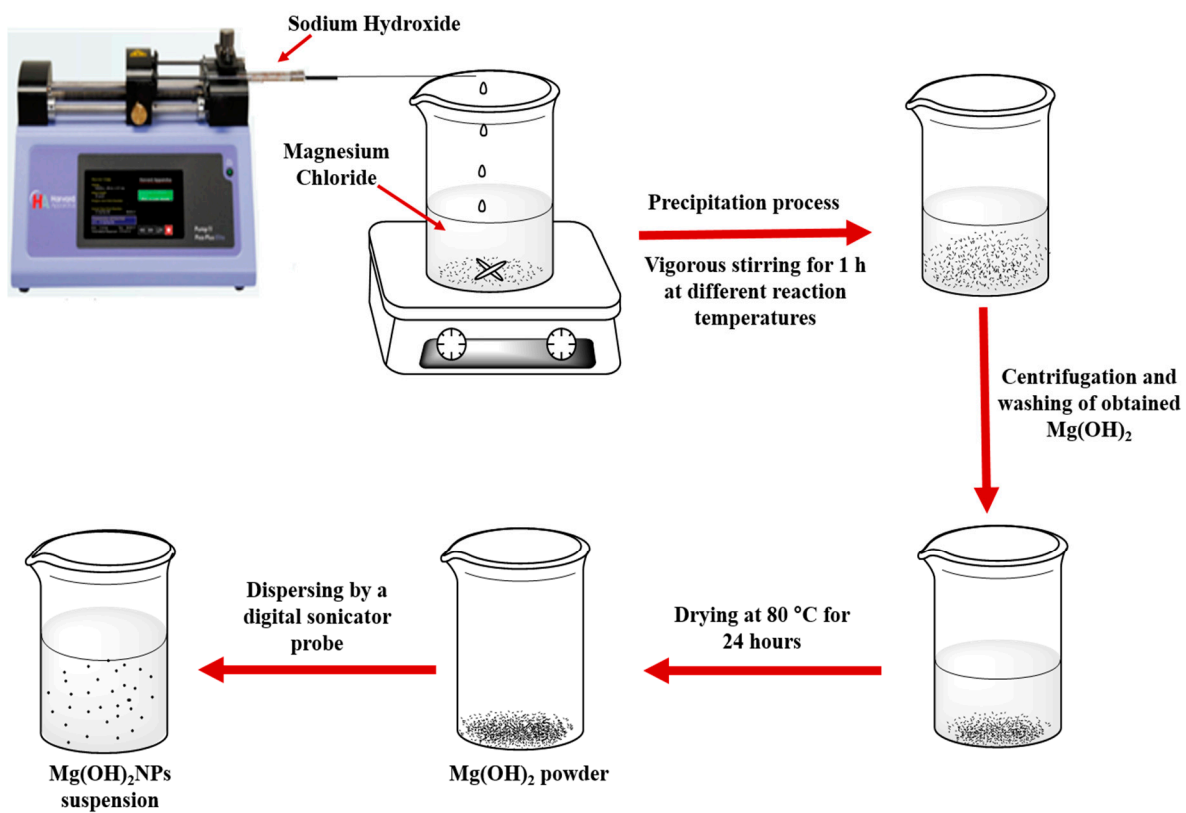

Figure S1. A schematic overview summarizing the synthesis method of  $\text{Mg}(\text{OH})_2\text{NPs}$ .

## 2. The particles size and zeta potential of Mg(OH)<sub>2</sub>NPs

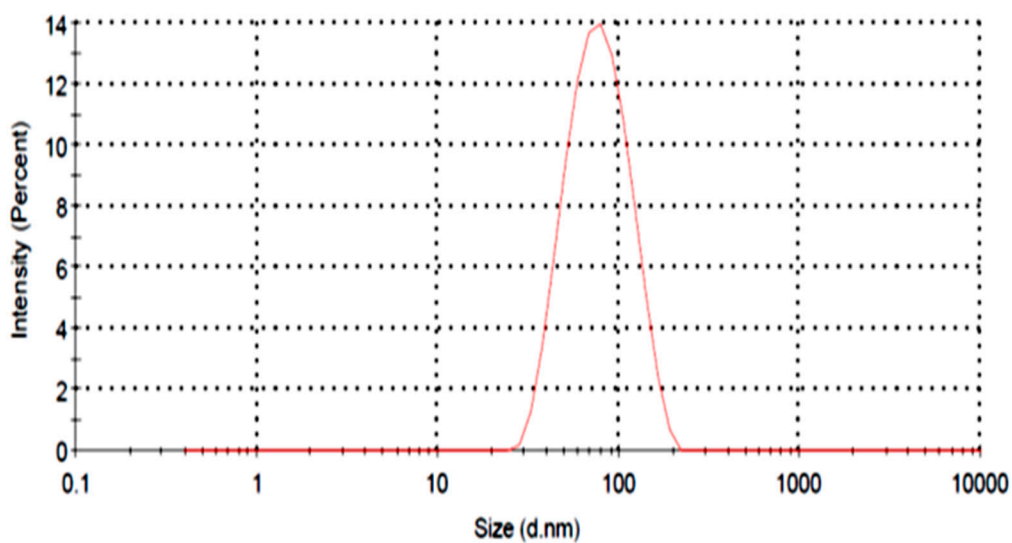

**Figure S2.** Particles size of Mg(OH)<sub>2</sub>NPs made from a magnesium chloride at 75°C.

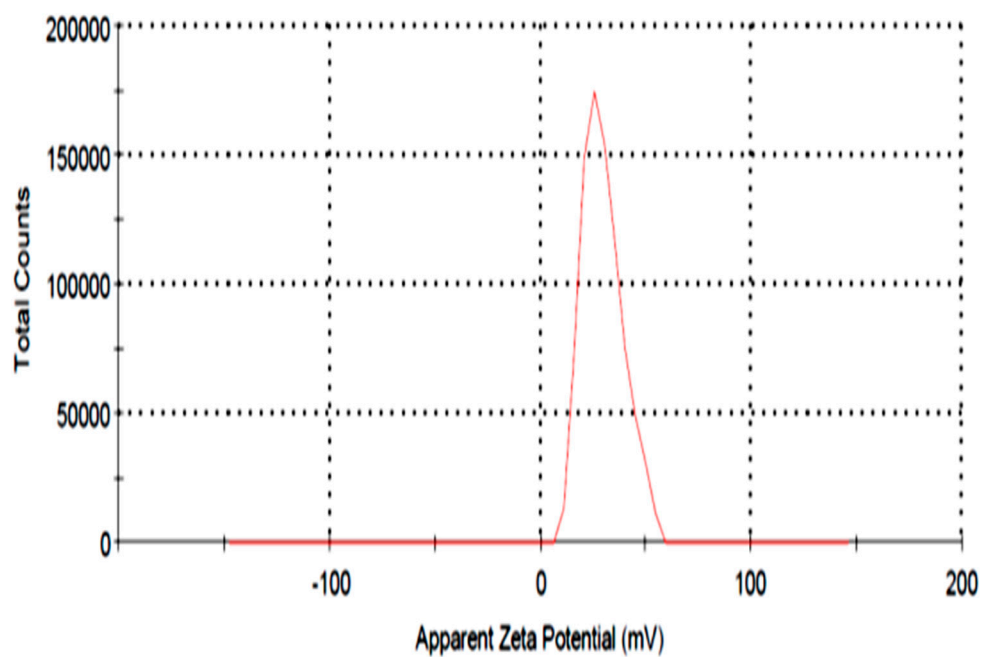

**Figure S3.** The zeta potential of Mg(OH)<sub>2</sub>NPs made from a magnesium chloride at 75°C.

### 3. Preparation and Characterization of Mg(OH)<sub>2</sub>NPs

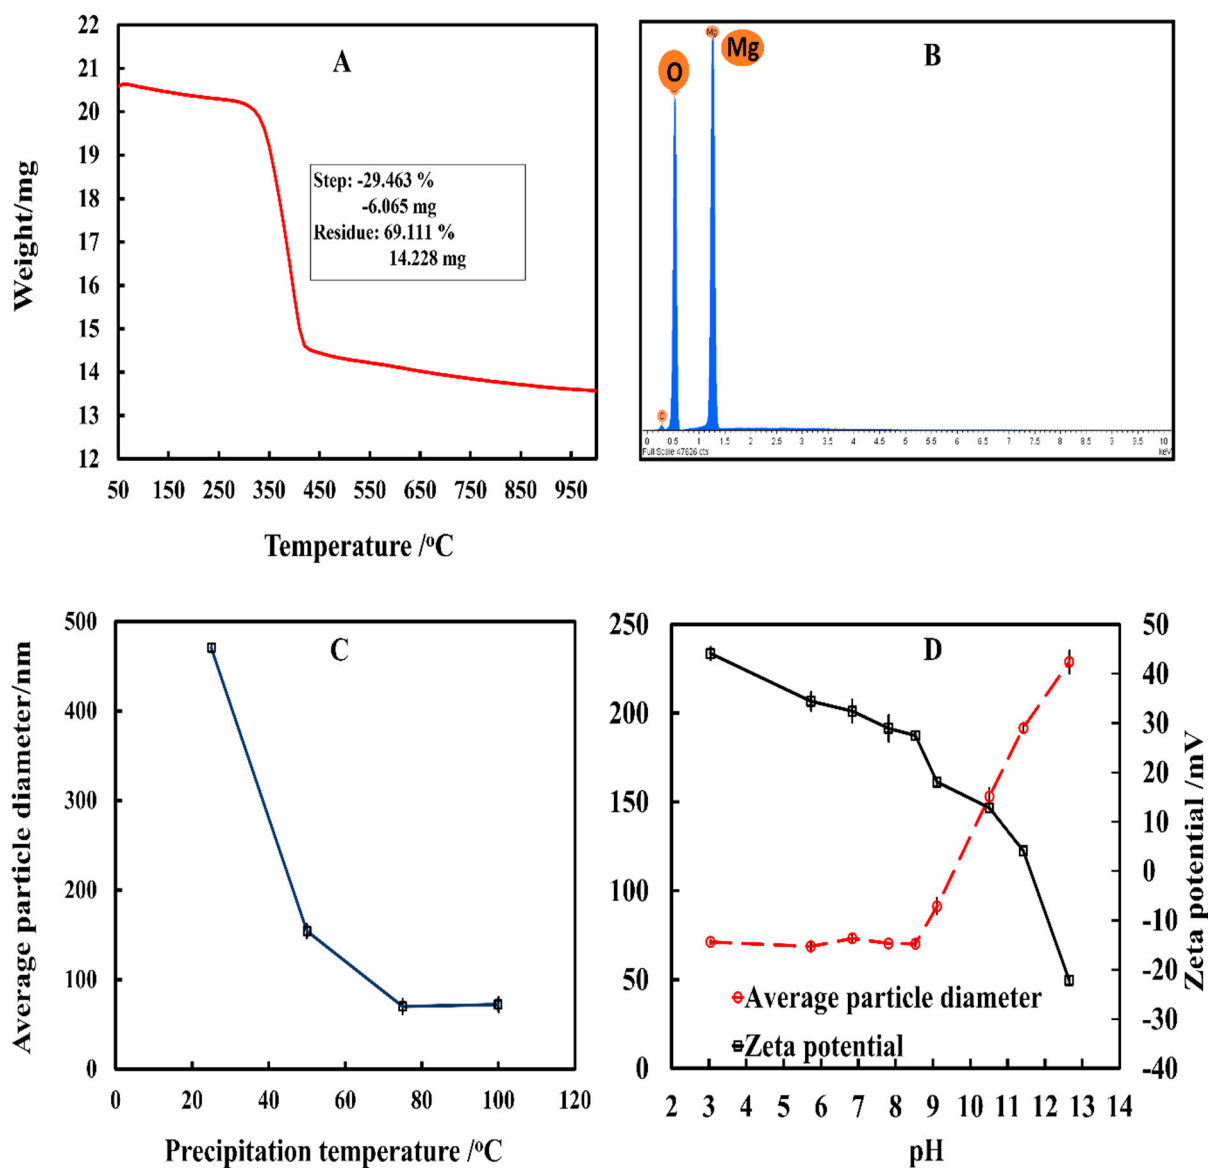

**Figure S4.** (A) Thermal gravimetric analysis pattern of Mg(OH)<sub>2</sub>NPs powder. (B) The EDX spectra of the uncoated Mg(OH)<sub>2</sub>NPs. (C) The impact of reaction temperature on the size of the produced Mg(OH)<sub>2</sub>NPs. (D) Variations in particle size and zeta potential of Mg(OH)<sub>2</sub>NPs suspensions with pH.

#### 4. Fourier Transform Infrared Spectroscopy (FTIR) of Mg(OH)<sub>2</sub>NPs

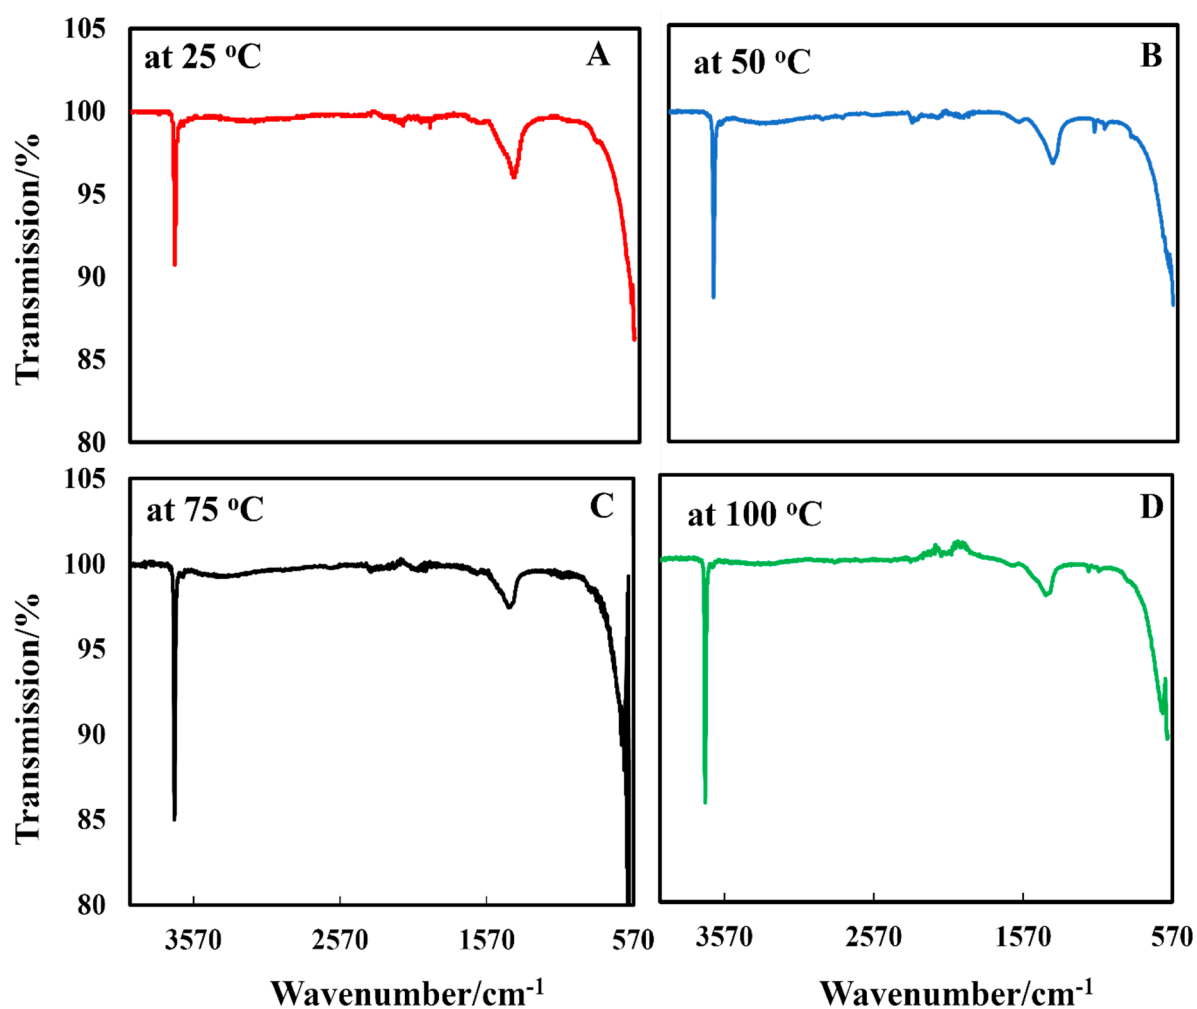

**Figure S5.** FTIR spectra of the as prepared Mg(OH)<sub>2</sub>NPs at different reaction temperatures; (A) 25 °C, (B) 50 °C, (C) 75 °C and (D) 100 °C.

5. EDX diagram of *S.cerevisiae* cells with  $\text{Mg}(\text{OH})_2\text{NPs}$

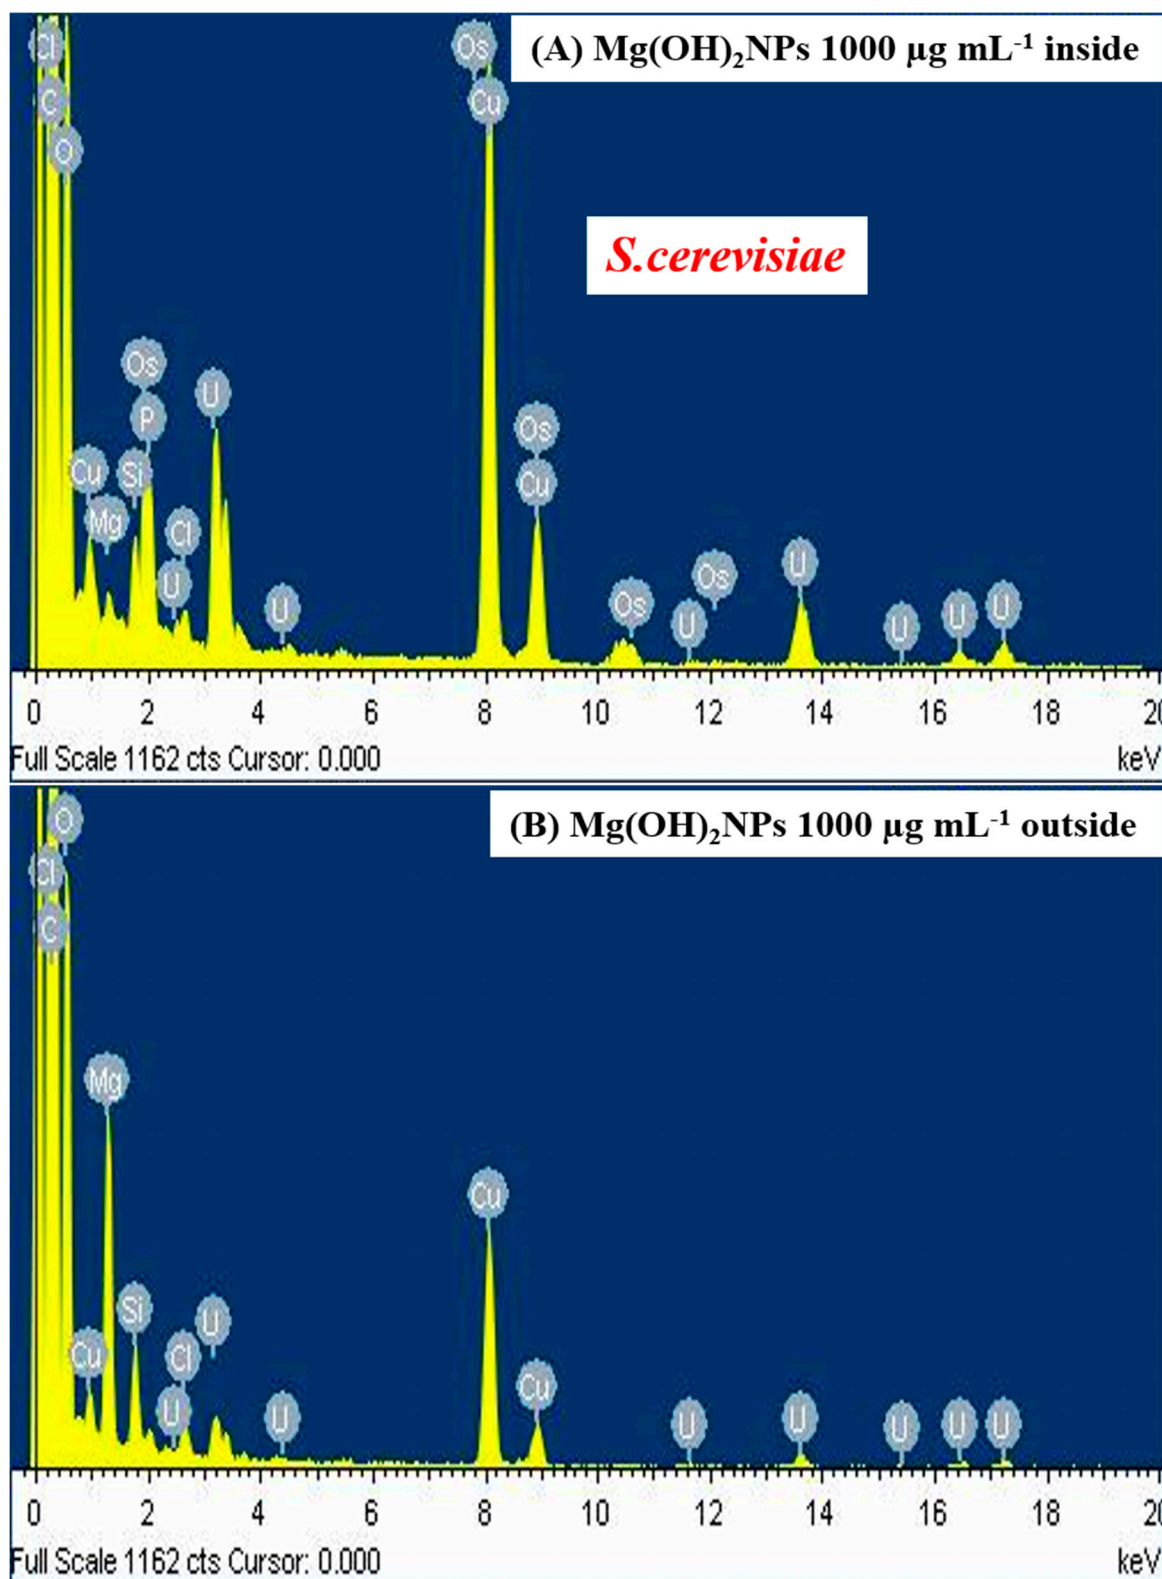

**Figure S6.** EDX diagram of *S.cerevisiae* cells at  $1000 \mu\text{g mL}^{-1}$ : (A) the inside membrane of *S.cerevisiae* and (B) the outside membrane of *S.cerevisiae*. The data indicate the existence of  $\text{Mg}(\text{OH})_2\text{NPs}$  on the outside part of the cell membrane.

## 6. EDX chart of the *C. reinhardtii* with Mg(OH)<sub>2</sub>NPs

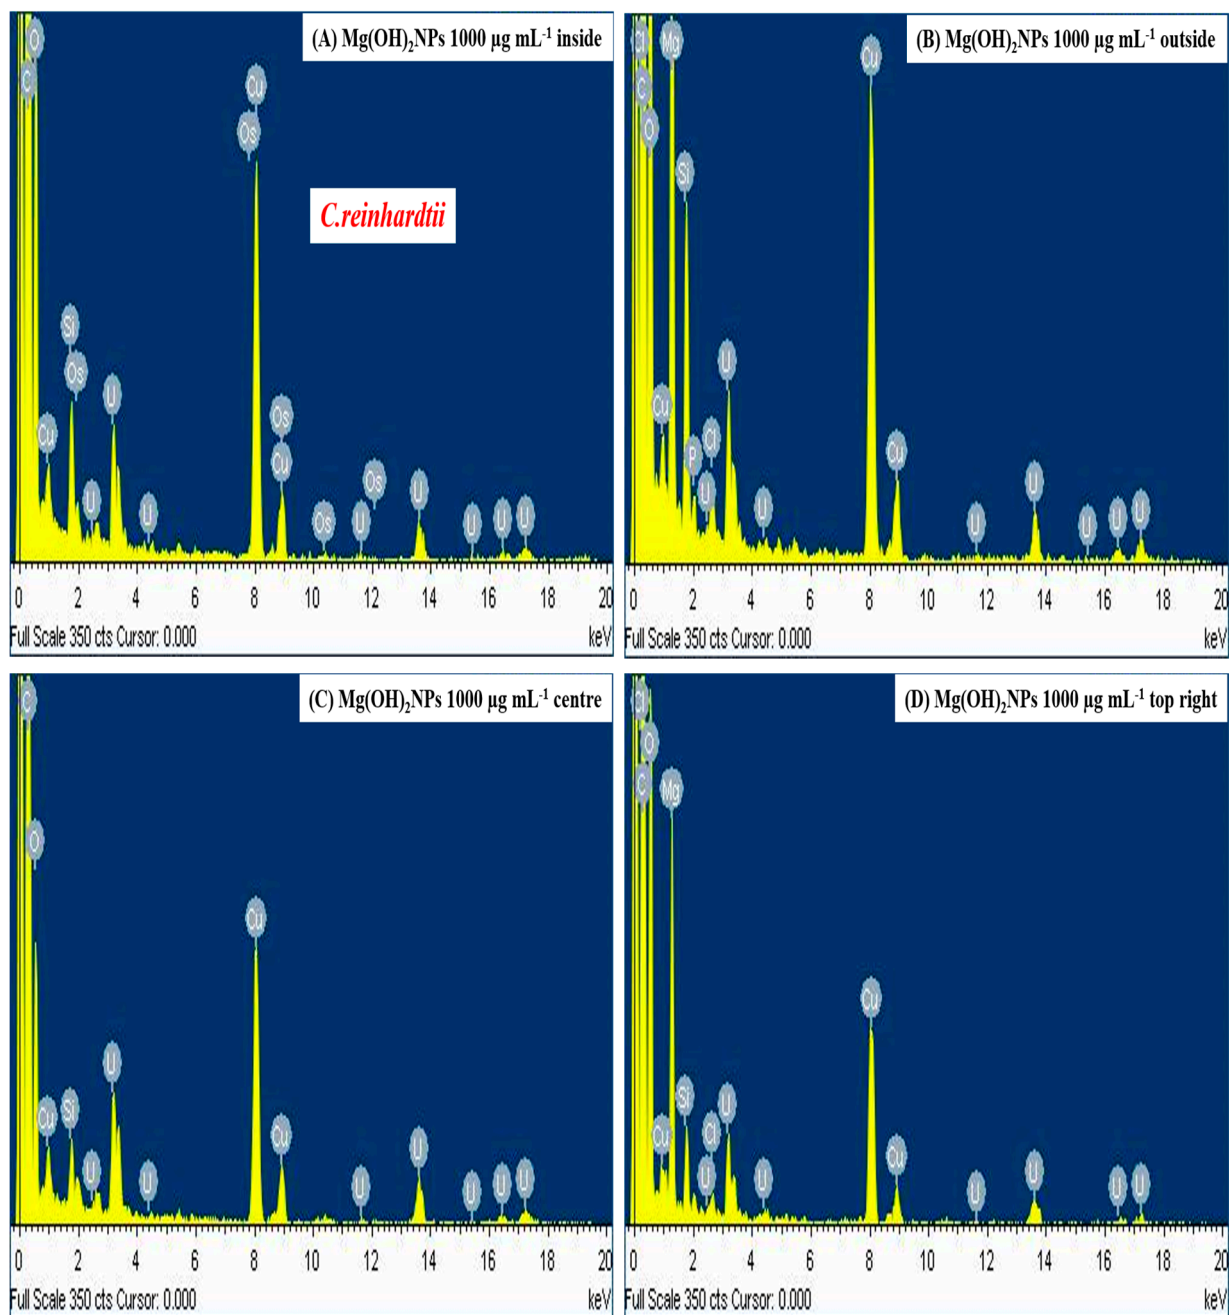

**Figure S7.** EDX chart of the *C. reinhardtii* with Mg(OH)<sub>2</sub>NPs at 1000 µg mL<sup>-1</sup>: (A) inside membrane of *C. reinhardtii* and (B) outside membrane of *C. reinhardtii* ; (C) centre cell and (D) top right. This demonstrates the lack of internalised Mg(OH)<sub>2</sub>NPs in *C. reinhardtii* even at NPs concentration 1000 µg mL<sup>-1</sup>.

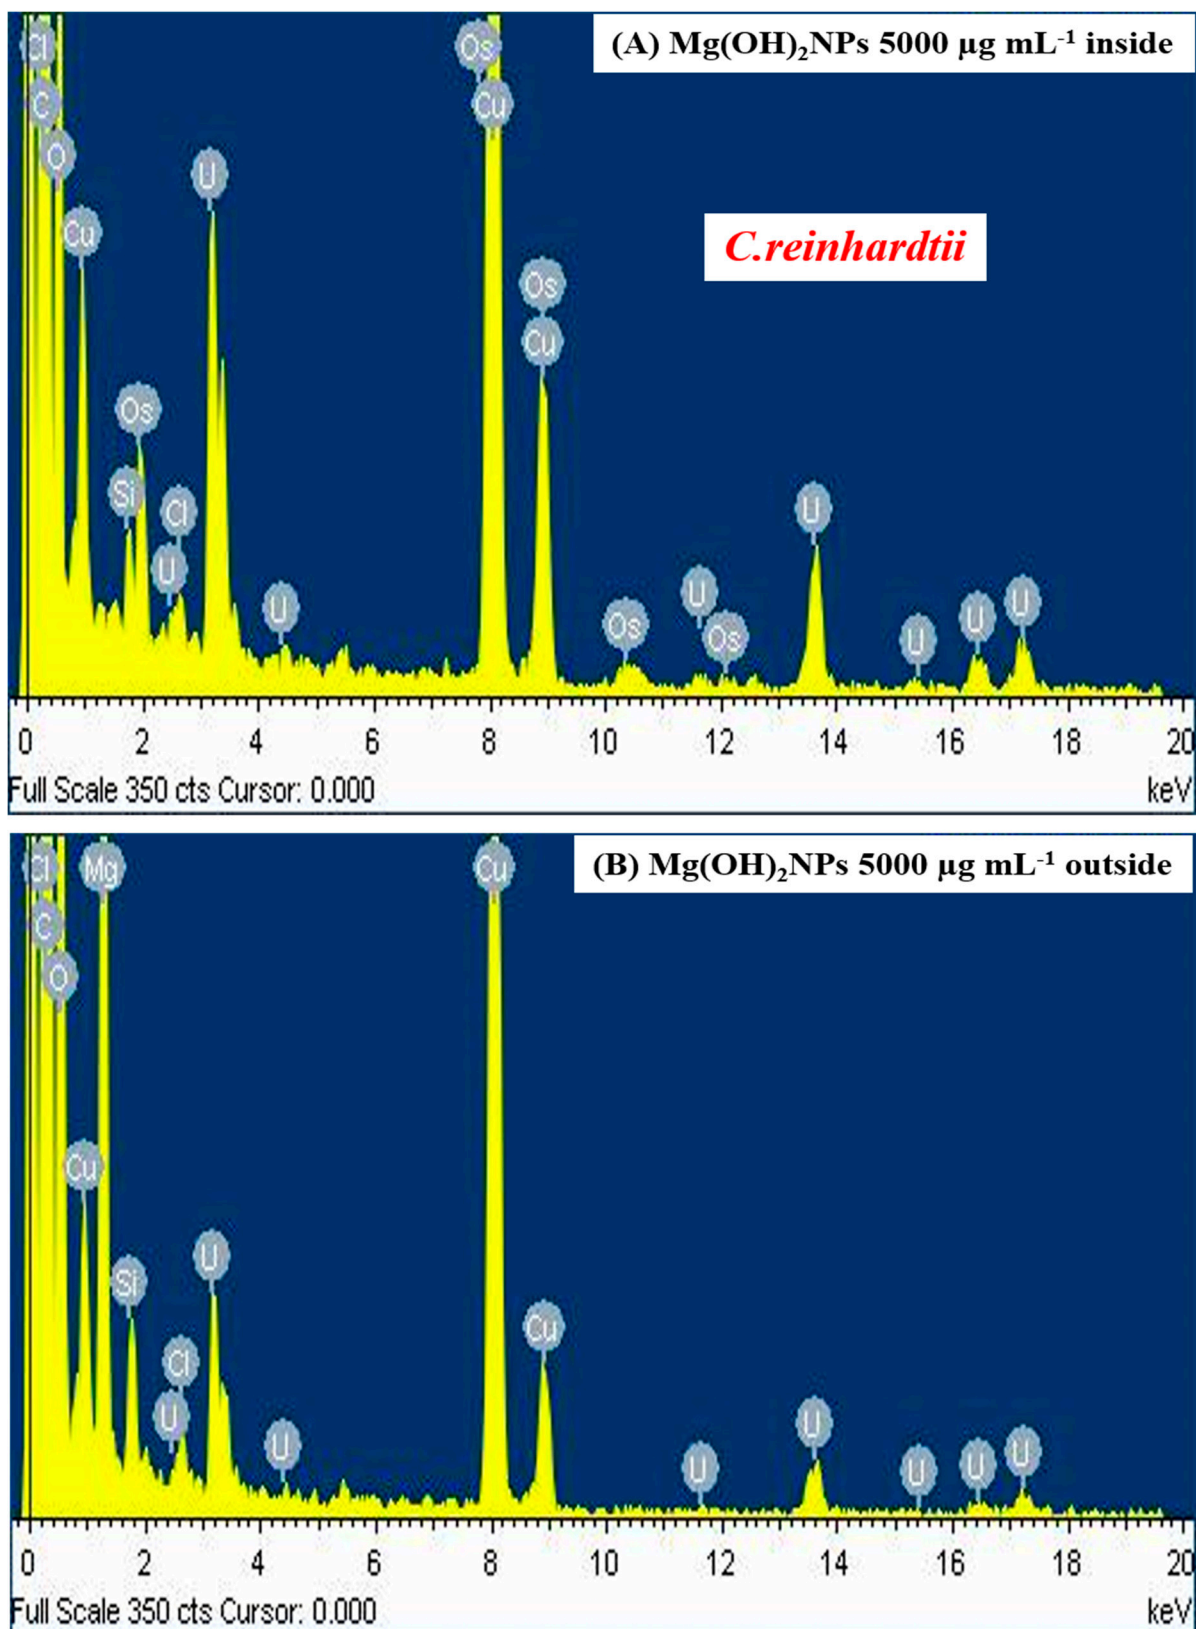

**Figure S8.** EDX chart of the *C. reinhardtii* with  $\text{Mg}(\text{OH})_2\text{NPs}$  at  $5000 \mu\text{g mL}^{-1}$ : (A) inside the membrane of the *C. reinhardtii* and (B) outer the membrane of the *C. reinhardtii*.



## 7. EDX chart of the *E. coli* with Mg(OH)<sub>2</sub>NPs

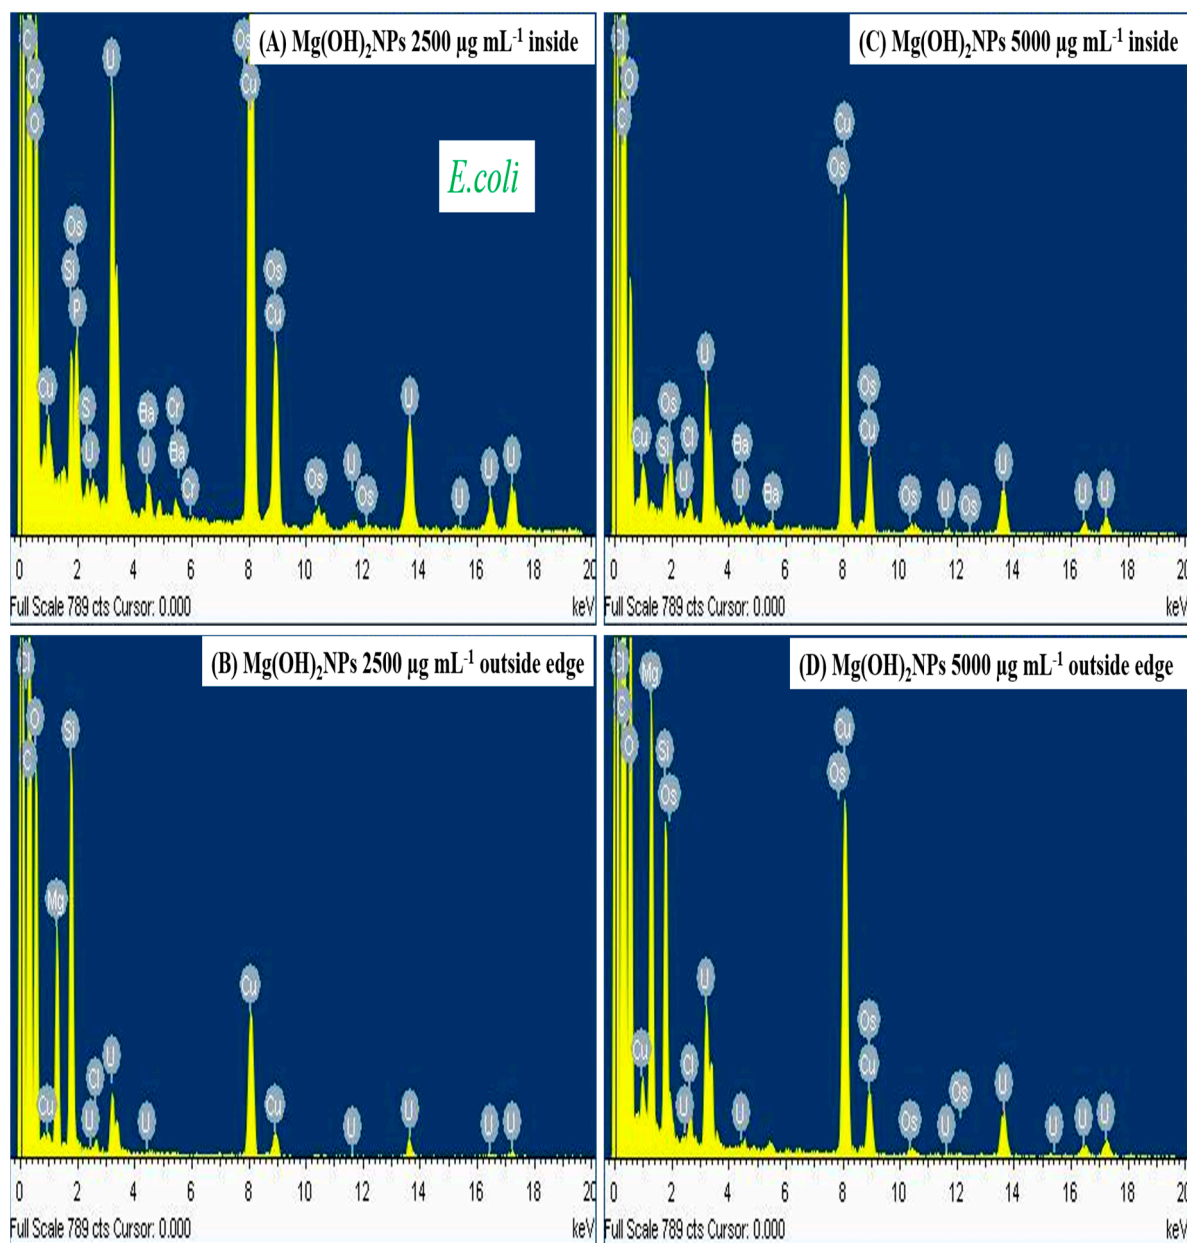

**Figure S9.** EDX diagram of *E. coli* cells incubated with Mg(OH)<sub>2</sub>NPs at 2500 µg mL<sup>-1</sup> and 5000 µg mL<sup>-1</sup>: (A) *E. coli* inside wall and (B) *E. coli* outer wall areas. (C) *E. coli* inside wall and (D) *E. coli* outer wall areas. The data indicate the existence of Mg(OH)<sub>2</sub>NPs on the external part of the cell membrane.

## 8. Schematic representation of the bacterial cell wall

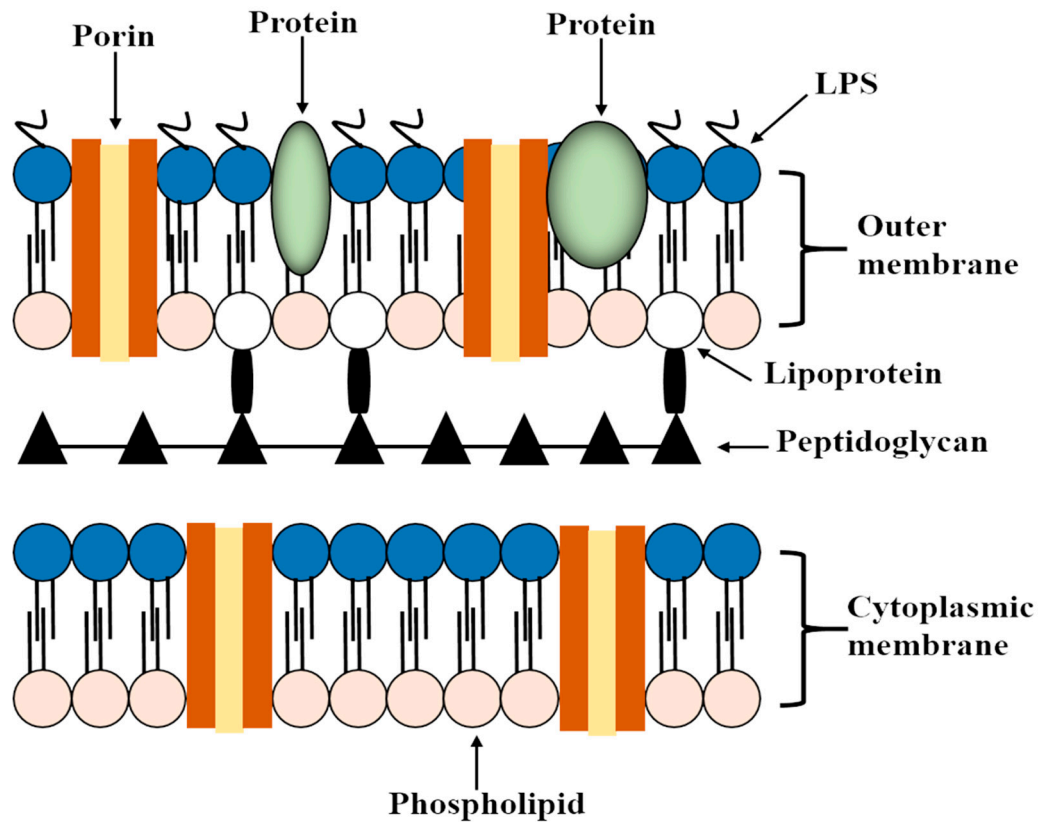

**Figure S10.** Schematic overview of the bacterial cell wall [37].

9. The antibacterial impact of MgCl<sub>2</sub> on *E. coli*

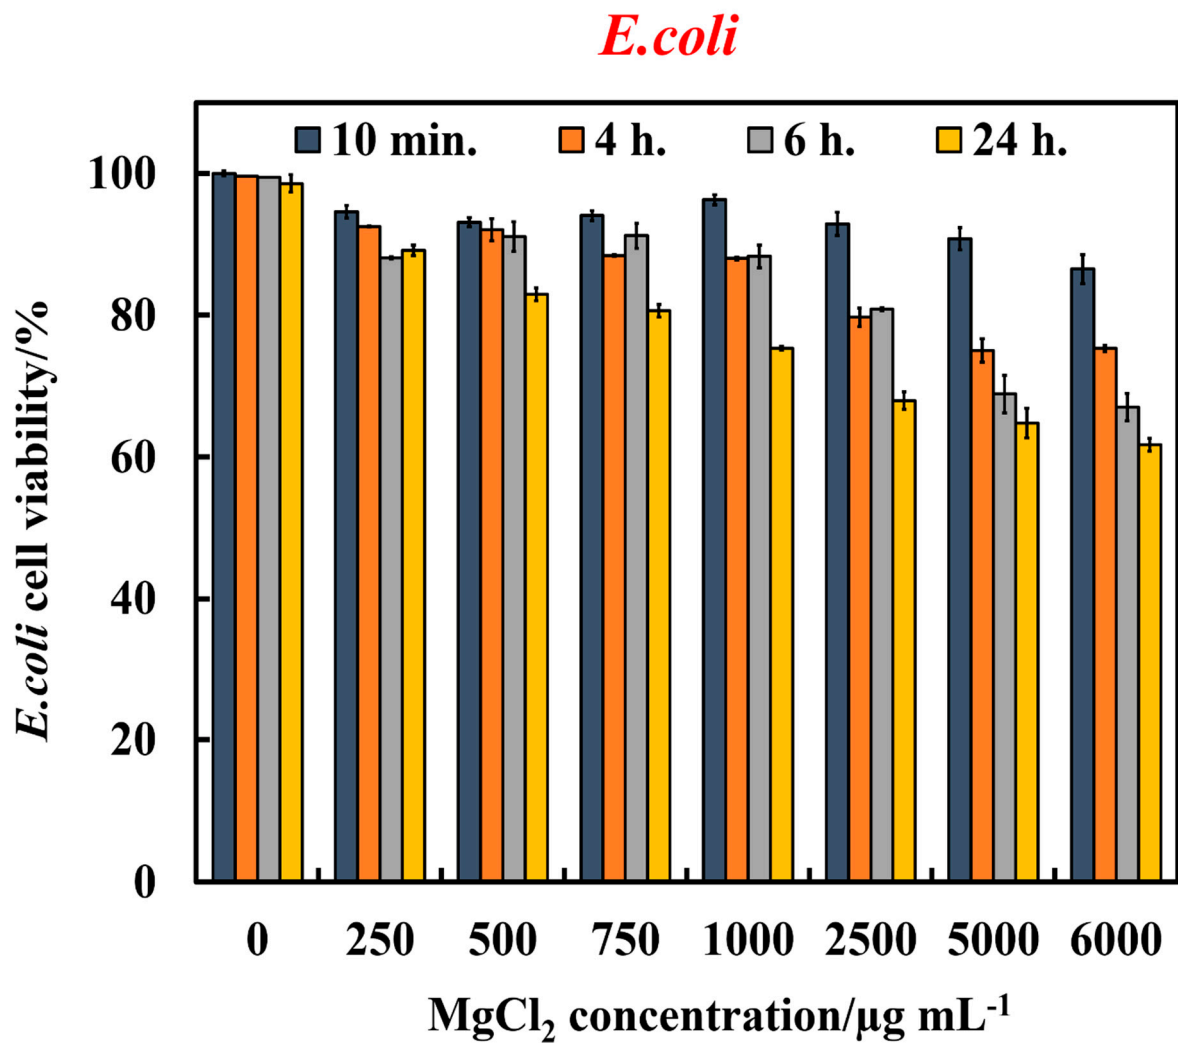

**Figure S11.** Antibacterial impact of various concentration of MgCl<sub>2</sub> towards *E. coli* for various exposure times. The experiment was achieved via incubated of *E. coli* with MgCl<sub>2</sub> for one day.

10. Comparison of the antimicrobial activity of uncoated and polyelectrolyte-coated Mg(OH)<sub>2</sub>NPs on *S.cerevisiae*, *C. reinhardtii* and *E. coli*

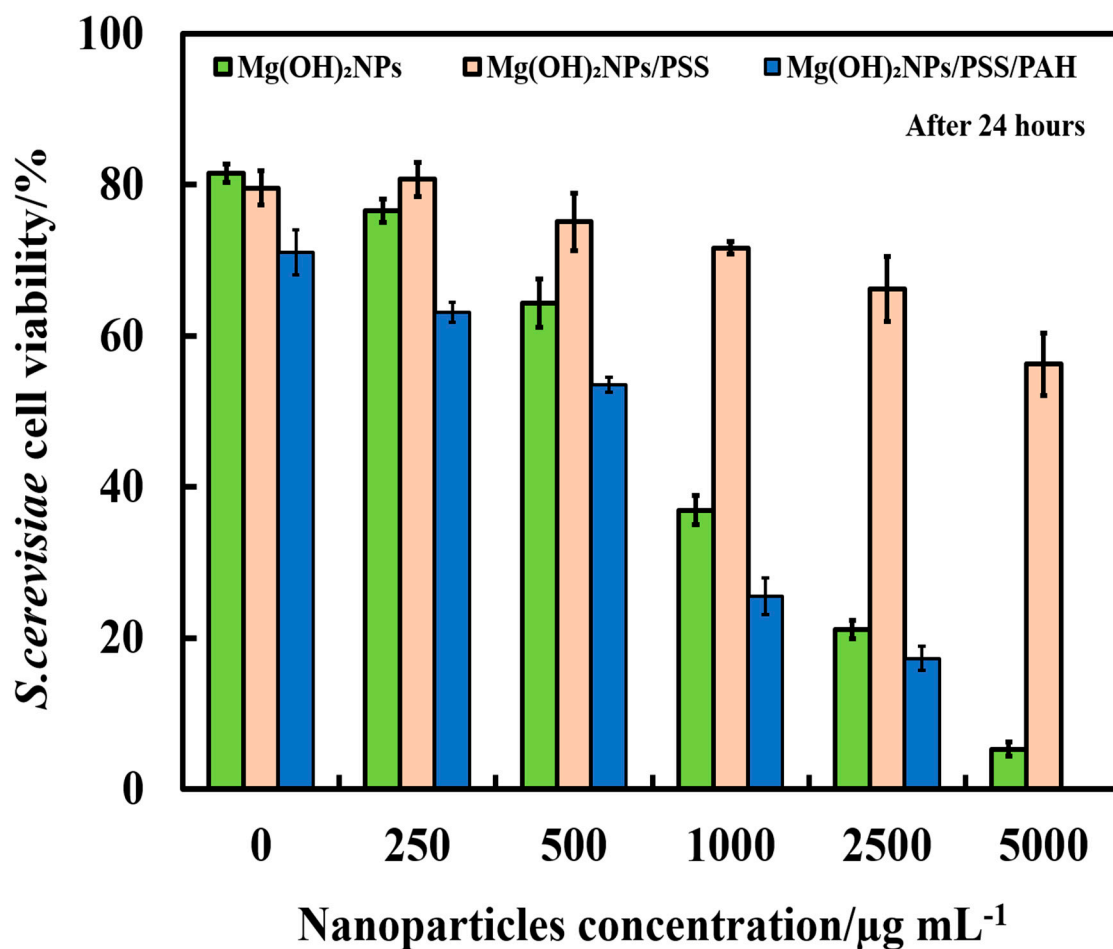

Figure S12. *S.cerevisiae* cell viability after incubation as a function of nanoparticle concentration for up to 24 hours with uncoated and polyelectrolyte-coated Mg(OH)<sub>2</sub>NPs.

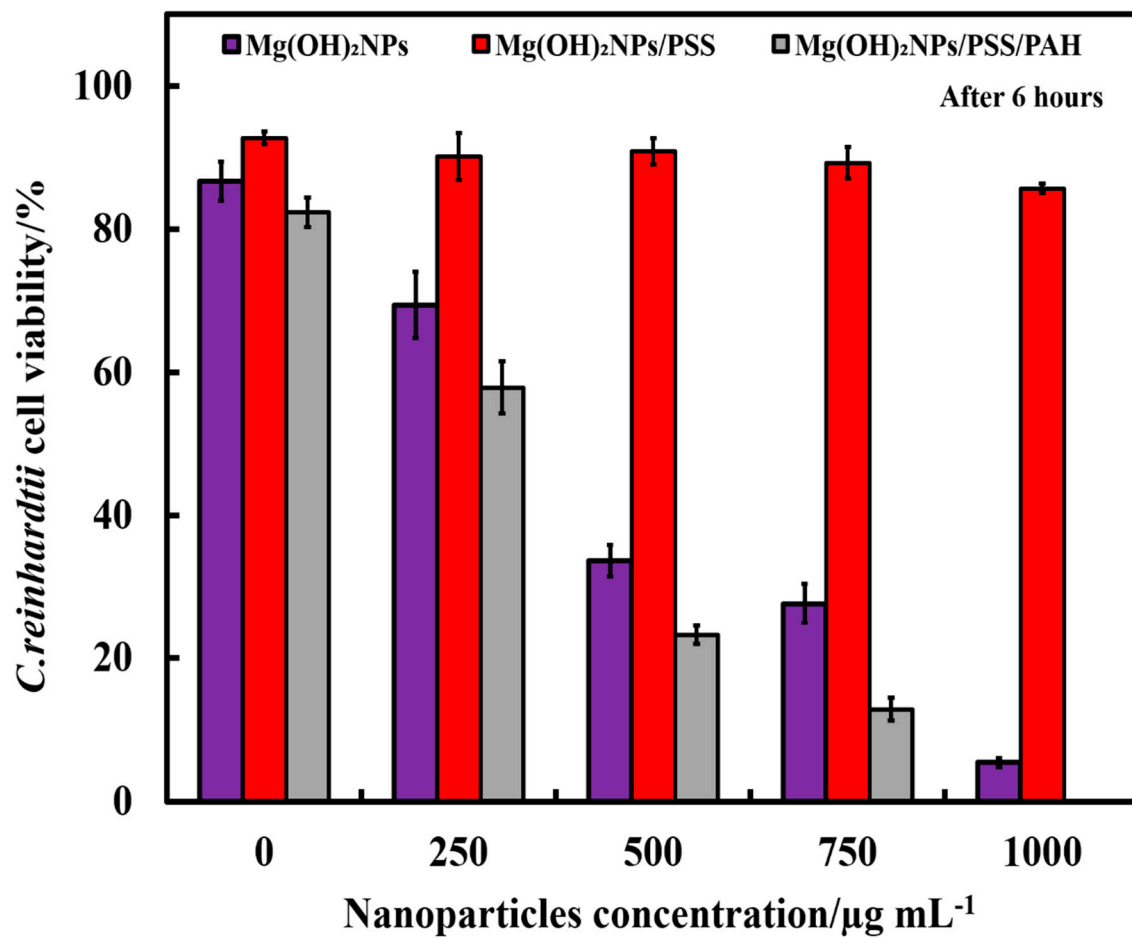

**Figure S13.** The antialgal activity of uncoated and polyelectrolyte-coated Mg(OH)<sub>2</sub>NPs.

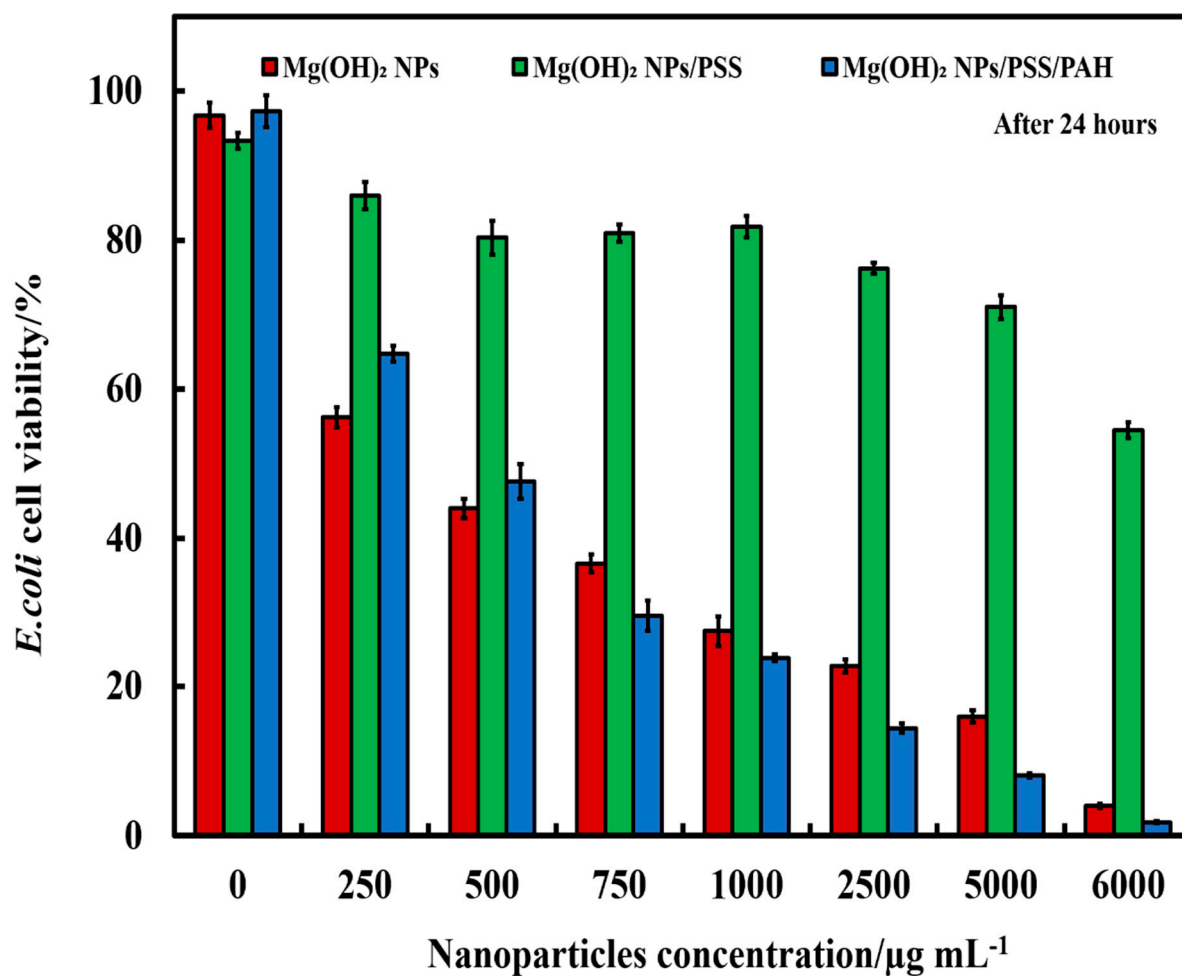

**Figure S14.** Relationship between the antibacterial efficiency of uncoated and polyelectrolyte-coated Mg(OH)<sub>2</sub>NPs on the viability of *E. coli*. *E. coli* was incubated for one day to 0, 250, 500, 750, 1000, 2500, 5000 and 6000  $\mu\text{g mL}^{-1}$  of different types of nanoparticles.

## 11. Colony forming units (CFUs) of the bare Mg(OH)<sub>2</sub>NPs and PAH-modified Mg(OH)<sub>2</sub>NPs against cells

Figure S15, Figure S16, Figure S17 and Figure S18 shows the CFUs assay of *S. cerevisiae*, *C. reinhardtii* and *E. coli* where the control samples of untreated bacteria were compared with the ones treated with bare Mg(OH)<sub>2</sub>NPs, Mg(OH)<sub>2</sub>NPs/PSS and Mg(OH)<sub>2</sub>NPs/PSS/PAH. The stock cultures of *C. reinhardtii* which were used for testing with typical concentration of  $4 \times 10^5$  cells per mL and  $9 \times 10^5$  cells per mL for *S. cerevisiae* determined by automatic cell counter (Cellometer Auto X4) and the *E. coli* bacterial culture stock was approximately  $5 \times 10^7$  cells per mL.

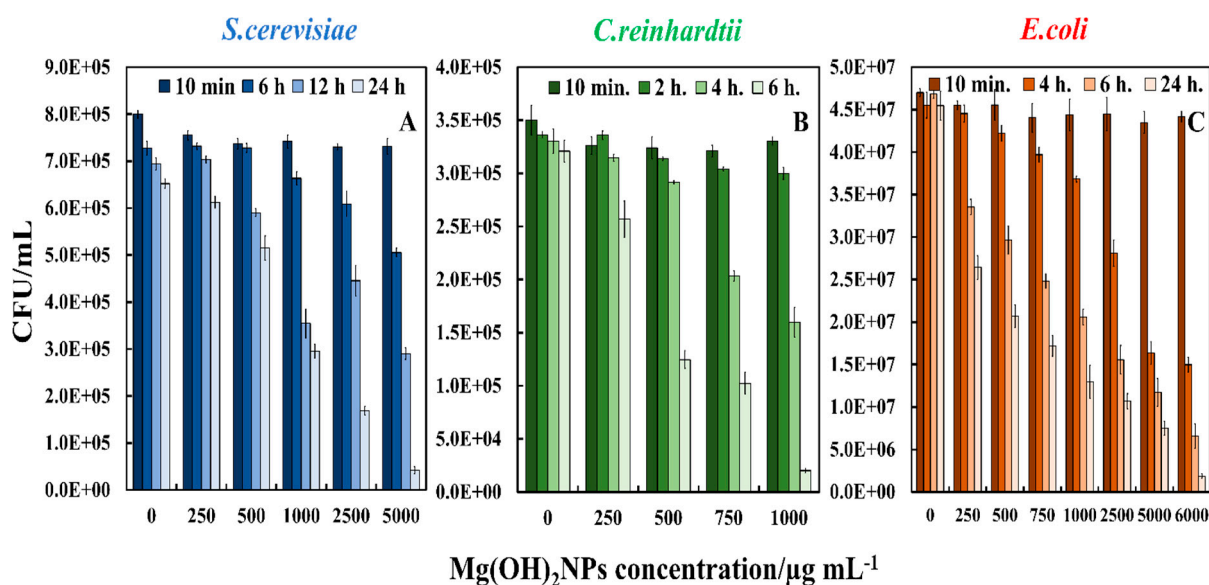

**Figure S15.** Colony forming unit (CFU) count of bare Mg(OH)<sub>2</sub>NPs on (A) *S. cerevisiae* (B) *C. reinhardtii* and (C) *E. coli* at various particle concentrations. The cells were incubated with the Mg(OH)<sub>2</sub>NPs at different periods of time shown.

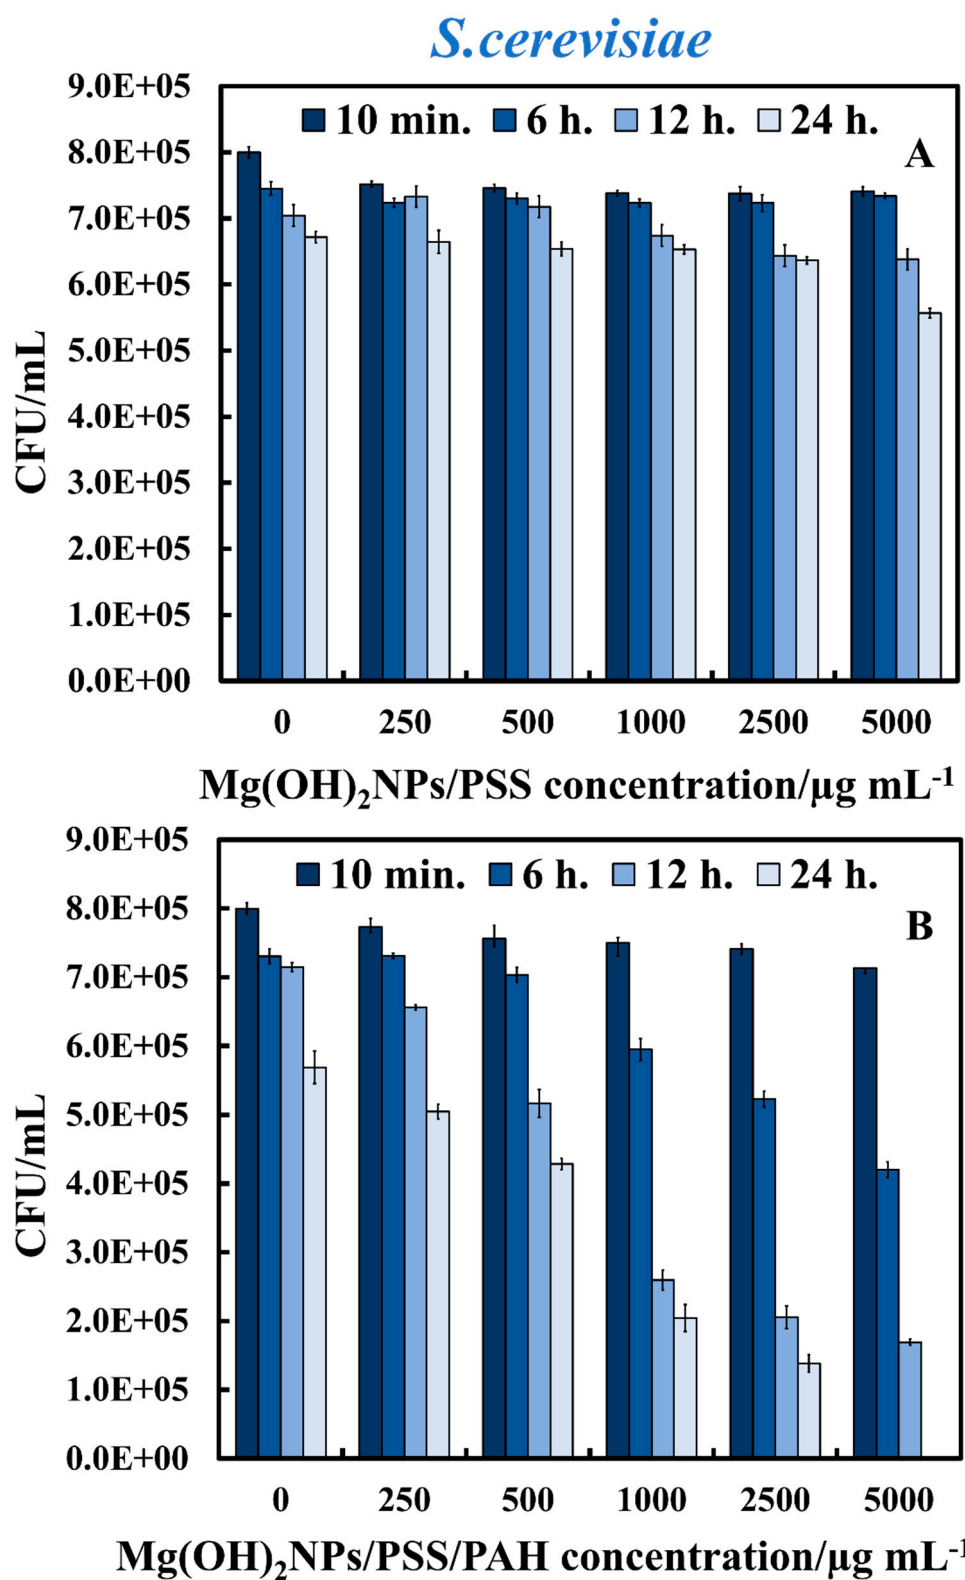

**Figure S16.** Colony forming unit (CFU) count of *S.cerevisiae* as a function of nanoparticle concentration after incubation for up to 24 hours with (A)  $\text{Mg(OH)}_2\text{NPs/PSS}$  and (B)  $\text{Mg(OH)}_2\text{NPs/PSS/PAH}$ .



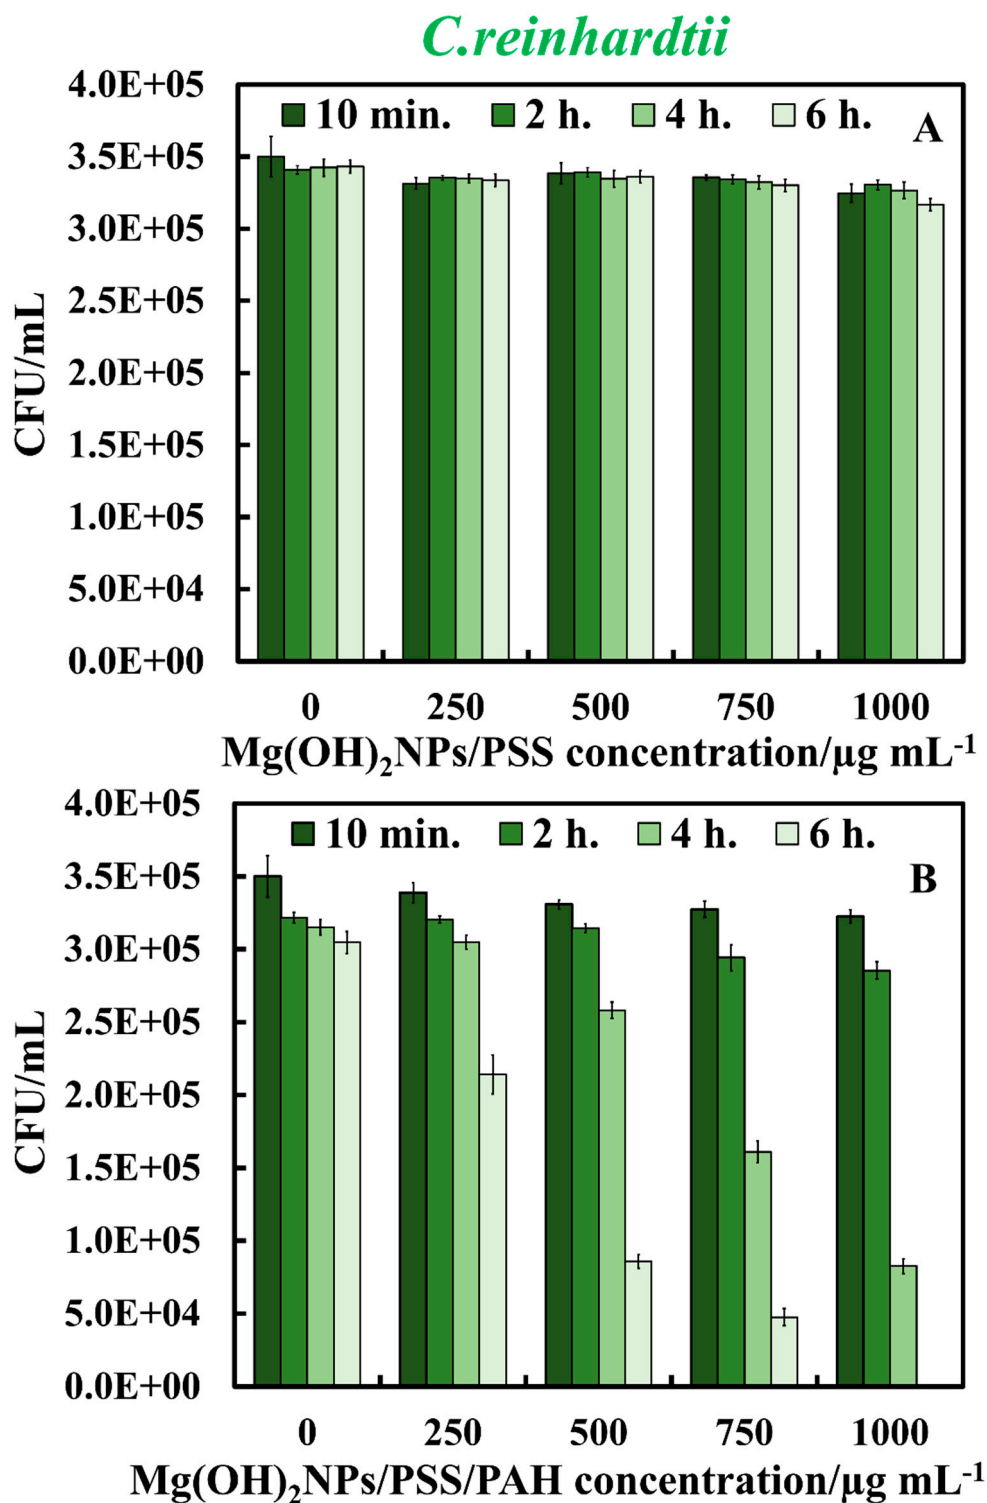

**Figure S17.** Colony forming unit (CFU) count of *C. reinhardtii* as a function of nanoparticle concentration after incubation for up to 6 h with (A) Mg(OH)<sub>2</sub>NPs/PSS and (B) Mg(OH)<sub>2</sub>NPs/PSS/PAH.

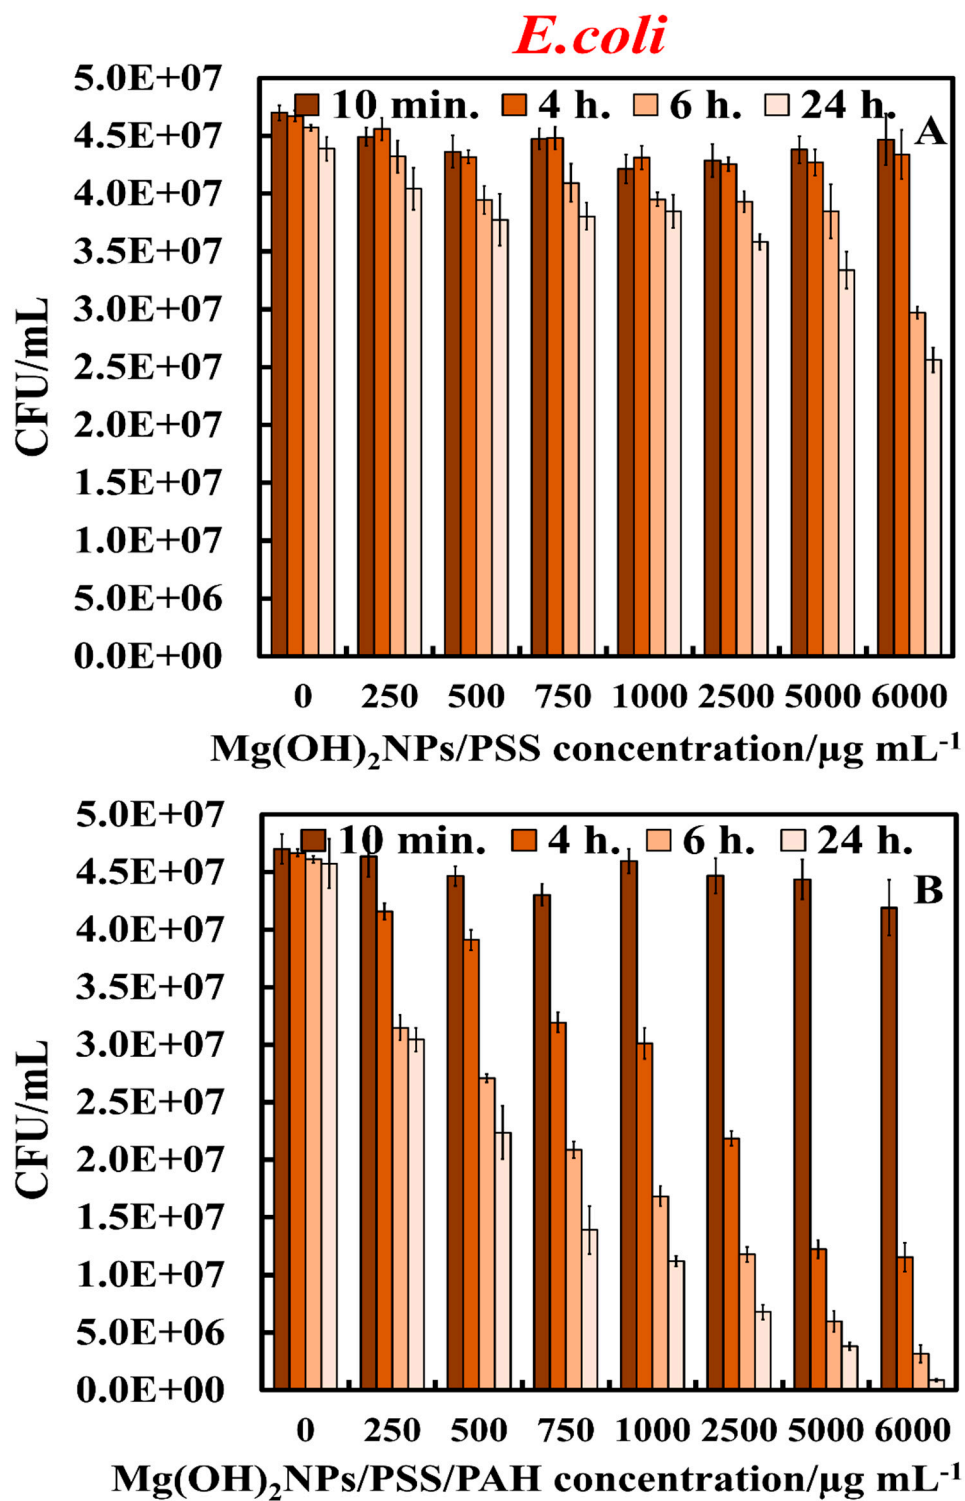

**Figure S18.** Colony forming unit (CFU) count of *E. coli* after treatment with (A) Mg(OH)<sub>2</sub>NPs/PSS and (B) Mg(OH)<sub>2</sub>NPs/PSS/PAH for various incubation times as a function of the NPs concentration.

12. HEK 293 cell viability in the presence of bare  $\text{Mg}(\text{OH})_2\text{NPs}$  and PSS/PAH-coated  $\text{Mg}(\text{OH})_2\text{NPs}$

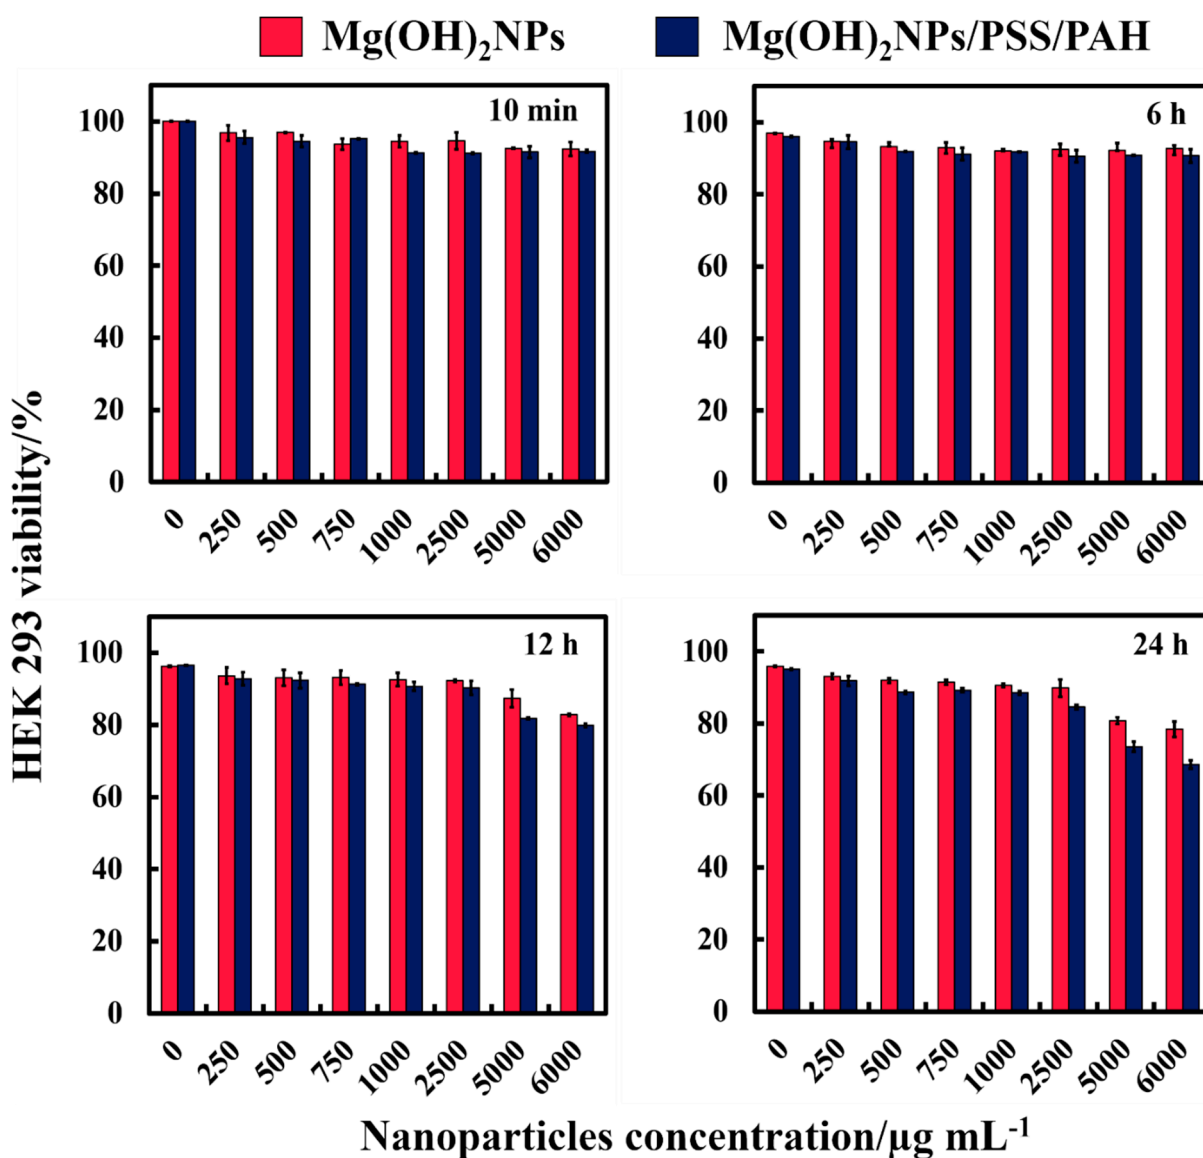

Figure S19. Comparison of the cell viability of human embryonic kidney cells (HEK 293 cell line) upon incubation as a function of nanoparticle concentration for up to 24 h with bare  $\text{Mg}(\text{OH})_2\text{NPs}$  and  $\text{Mg}(\text{OH})_2\text{NPs/PSS/PAH}$ .

### 13. Antimicrobial assay of SiO<sub>2</sub>NPs on *E. coli*

Figure S20 shows the antimicrobial assay of SiO<sub>2</sub>NPs on *E. coli* for up to 24 hours of exposure at different SiO<sub>2</sub>NPs concentrations. We used SiO<sub>2</sub>NPs as a negative control for comparing the toxicity of the Mg(OH)<sub>2</sub>NPs. One can see a very small effect on the presence of bare SiO<sub>2</sub>NPs on the *E. coli* viability. Note that even the control sample of *E. coli* have lost some of their viability over this period of time due to depletion of the media.

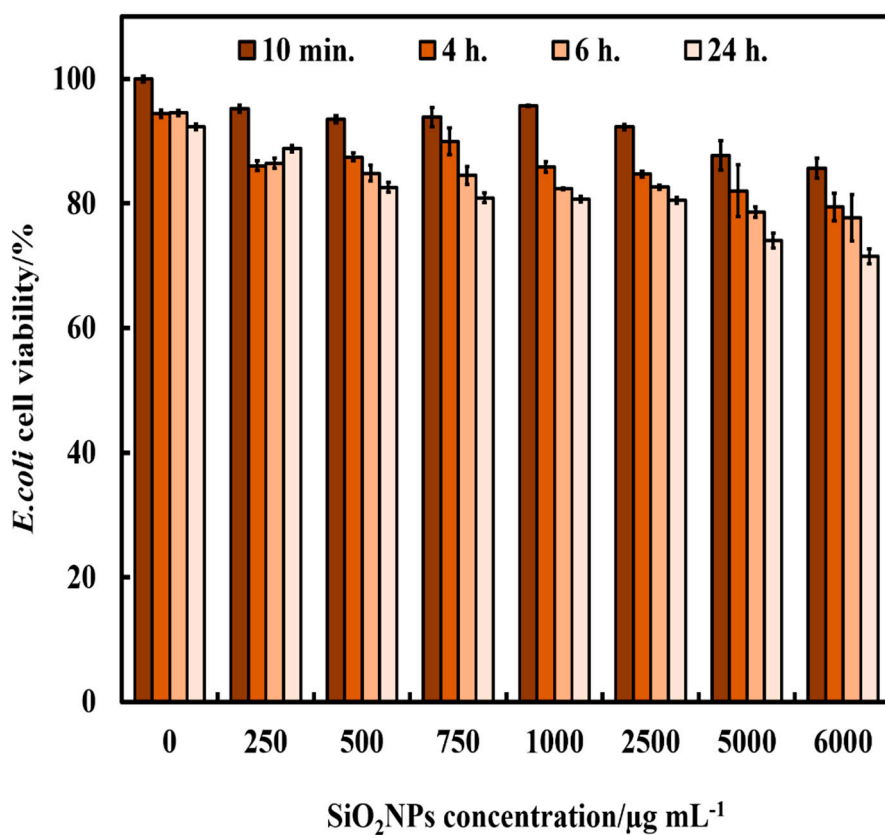

**Figure S20.** Antibacterial activity of SiO<sub>2</sub>NPs at various concentrations on *E. coli*. The *E. coli* cells were incubated with the SiO<sub>2</sub>NPs at 10 min, 4 h, 6 h and 24 h of exposure before being washed and tested for their cell viability.

#### 14. Anti-yeast, anti-algal and antibacterial activity of free PAH in solution

There is no free PAH in the PSS/PAH-coated Mg(OH)<sub>2</sub>NPs suspension since we wash the PSS/PAH-coated Mg(OH)<sub>2</sub>NPs multiple times by centrifugation and discard the supernatant. To check possible effects from leaching polyelectrolytes we did antimicrobial testing of free PAH on *S. cerevisiae*, *C. reinhardtii* and *E. coli*. Figure S21 shows the antimicrobial assay of the free PAH on *S. cerevisiae*, *C. reinhardtii* and *E. coli* for up to 6 hours for *C. reinhardtii* and 24 hours for *S. cerevisiae* and *E. coli* of exposure. Both runs were done at the varying overall PAH concentration and different incubation times. One can see a very small effect on the presence of free PAH on the *cells* viability. One can conclude that the free PAH does not measurably impact the cell viability up to 5000 µg mL<sup>-1</sup> for *S. cerevisiae*, 1000 µg mL<sup>-1</sup> for *C. reinhardtii* and 6000 µg mL<sup>-1</sup> for *E. coli*. Note that in our Mg(OH)<sub>2</sub>NPs/PSS/PAH nanoparticles there is not ant free PAH and free PSS as the particles have undergo multiple washing/centrifugation cycles after their surface functionalization. However, at these concentrations of the PAH- coated on Mg(OH)<sub>2</sub>NPs, the effect of the Mg(OH)<sub>2</sub>NPs on *S. cerevisiae*, *C. reinhardtii* and *E. coli* is very significant – see Figure 4, Figure 9, Figure 10 and Figure 11 in the main paper, respectively. Therefore, one may conclude that the PSS/PAH-coated Mg(OH)<sub>2</sub>NPs show excellent anti-yeast, anti-algal and antibacterial with these cells which is not related to free PAH.

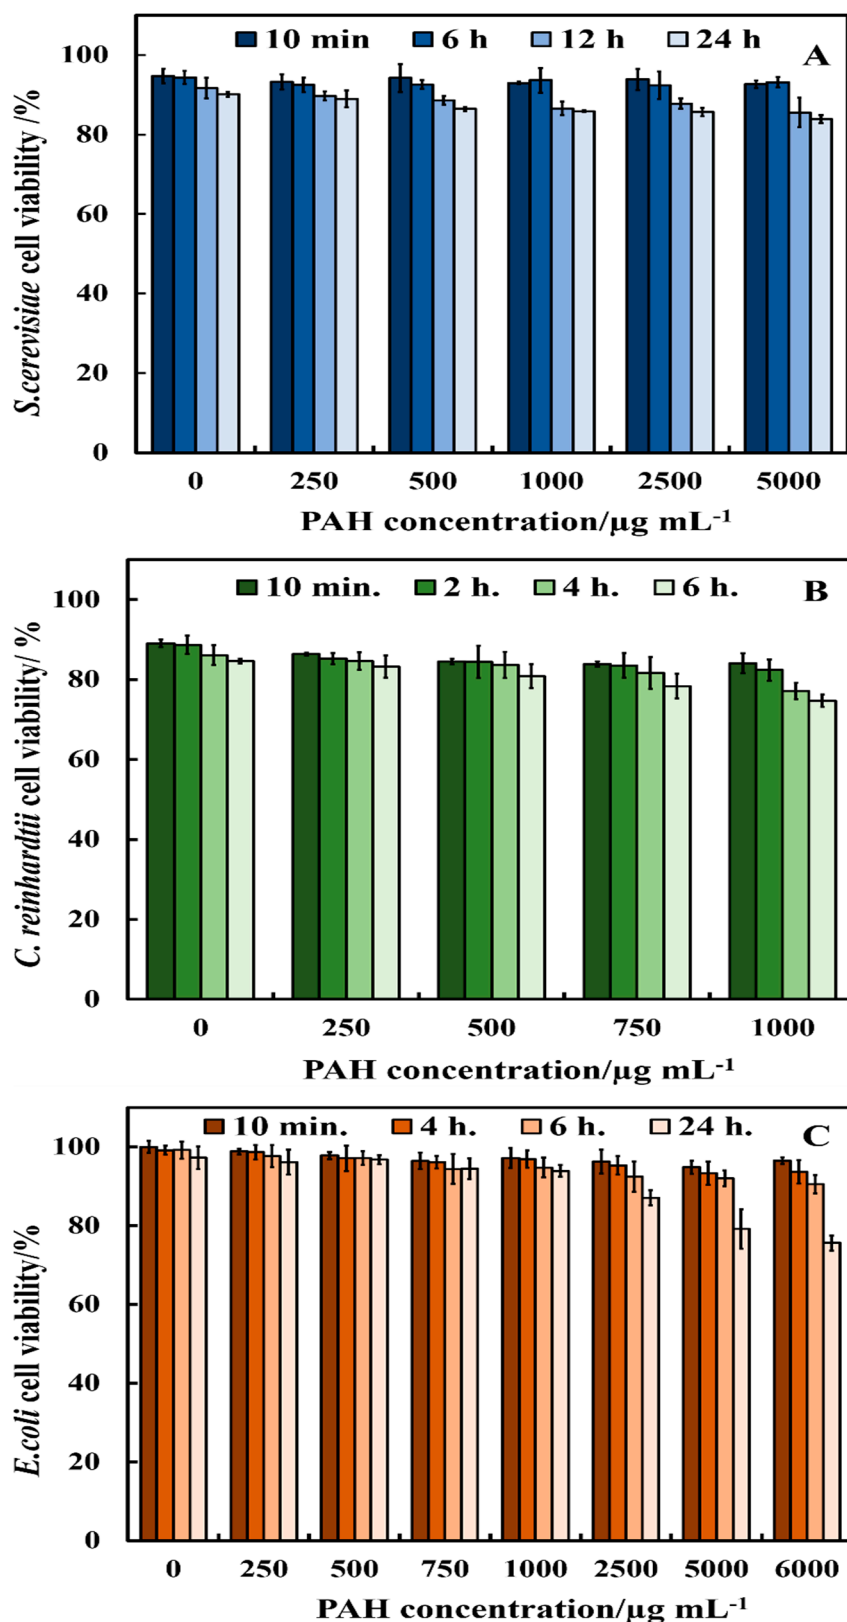

**Figure S21.** The anti-yeast, anti-algal and antibacterial activity of free PAH at various concentrations on (A) *S. cerevisiae*, (B) *C. reinhardtii* (C) *E. coli*. The cells were incubated with the free PAH at different times of exposure before being washed and tested for their cell viability.
